# Supplementary material for: Functional proteomic analysis reveals the involvement of KIAA1199 in breast cancer growth, motility and invasiveness
Source: BMC Cancer. 2014 Mar 15;14:194. doi: 10.1186/1471-2407-14-194 (PMC4007601; doi:10.1186/1471-2407-14-194)
Supplement: Additional file 1: Table S1 — The sequence of the primers used in this study for the semi-quantitative RT-PCR analysis. [file 1471-2407-14-194-S1.xls]

## Sheet: Table S1
Additional Table S1. The sequence of the primers used in this study for the semi-quantitative RT-PCR analysis
Target Gene Name	Primer Name	Sequence (5'->3')
KIAA1199	KIAA1199-F	GTGAGCCACACGAGCTTCAG
	KIAA1199-R	GGATGGTCGCCACATAGTTGA
S100A11	S100A11-F	AGCGGTGCATCGAGTCCCTGA
	S100A11-R	CGCTTCTGGGAAGGGACAGCC
WASL	WASL-F	GCGGAGGGTCACCAACGTGG
	WASL-R	CCAGAGCAGGACACTGGCCG
PPP1R9B	PPP1R9B-F	TGGACGTCGTGGTGCGCTTC
	PPP1R9B-R	CGTCGTCCTCCTCCAGGGCA
GAPDH	GAPDH-F	ACGGATTTGGTCGTATTGGG
	GAPDH-R	TGATTTTGGAGGGATCTCGC
